# Supplementary material
Source: PubMed Central journal article supplement (PMC4453776)
Supplement: supp_pp.15.00066_00066finrevsupp.pdf [file supp_pp.15.00066_00066finrevsupp.pdf]

## **Supplemental Materials**

### **Supplemental Text**

#### **MATERIALS AND METHODS**

##### **Database formation**

Studies containing  $\epsilon_c$  or “radiation use efficiency” in important food crops spanning major plant groups and C<sub>4</sub> biofuel crops were found using Web of Science (ISI, Philadelphia, PA, USA; Supplemental Table S1). Articles were mined for information regarding crop husbandry, growing location and conditions, and details regarding  $\epsilon_c$  measurements and calculations. Values and extra information only available in figures were digitized using Grafula 3 version 2.10 (Wesik SoftHaus, St Petersburg, Russian Federation).

Studies were omitted by certain criteria to minimize bias in reported  $\epsilon_c$ . Since non-field growth conditions can influence  $\epsilon_c$  (Slattery et al., 2013), experiments not conducted in the field free of enclosure or root barriers were excluded. Studies that included belowground biomass in their measurements (with the exception of peanut and potato, where biomass included the reproductive or vegetative storage structures growing belowground) were also excluded since methods of measuring belowground biomass were less reliable and hugely more variable than aboveground biomass measurements.  $\epsilon_c$  values based on incident radiation were not included due to potential bias caused by changes in interception efficiency (Monteith, 1994).  $\epsilon_c$  values obtained in the presence of intercropping, nutrient deficiency, disease, or other imposed stresses such as elevated atmospheric gases were removed because these factors significantly alter  $\epsilon_c$  (Slattery et al., 2013). If several nutrient treatments were imposed in a study, only the value with the optimal nutrient application was kept for each experiment within the study to avoid depressions in  $\epsilon_c$  due to nutrient limitations. Since  $\epsilon_c$  is often lower in reproductive stages compared to vegetative stages (Sinclair and Muchow, 1999), only values obtained from vegetative stages or the entire growing season were retained. Values from the same study were only kept if they were considered independent (i.e., growth period, location, cultivar, treatment or treatment level differed; Ainsworth et al., 2002). Crops with limited data ( $n < 40$ ) were omitted to prevent biased estimates of  $\epsilon_c$ .

##### **Data manipulation and gap filling**

$\epsilon_c$  values were reported in various combinations of units and were standardized to MJ of dry matter per MJ absorbed photosynthetically active radiation (APAR) before analyses. Values with mass units were multiplied by the energy content of the crop tissue type (Table I). If a value encompassed both vegetative and reproductive stages, the mean aboveground plant energy factor was used, whereas values from solely vegetative stages used the energy based on vegetative tissues only (Table I). Radiation values were converted to MJ APAR using the conversion factors reported by Gower et al. (1999) and assuming an average leaf area index of 4.0. Measurements based on intercepted PAR were converted to APAR using a multiplier of 1.04 whereas values based on intercepted solar radiation were multiplied by 1.96 to convert to APAR (Gower et al., 1999).

Despite removing studies containing clearly stressful conditions, there was substantial variation in the recorded weather/climate related conditions that can cause variation in  $\epsilon_c$  (Slattery et al., 2013). These conditions were used as independent variables in multiple regression analyses and included: mean annual [CO<sub>2</sub>] for the year(s) the experiments were conducted, mean growing season temperature (T), available incident solar radiation during the growing season ( $S_t$ ), and the amount of precipitation (rain and irrigation) available during the growing season (H<sub>2</sub>O). Mean annual [CO<sub>2</sub>] data were obtained from Dr. Pieter Tans, NOAA/ESRL ([www.esrl.noaa.gov/gmd/ccgg/trends/](http://www.esrl.noaa.gov/gmd/ccgg/trends/)) and Dr. Ralph Keeling, Scripps Institution of Oceanography ([scrippsco2.ucsd.edu/](http://scrippsco2.ucsd.edu/)). Whenever possible, missing T and H<sub>2</sub>O data were obtained from NOAA ([www7.ncdc.noaa.gov/CDO/cdo](http://www7.ncdc.noaa.gov/CDO/cdo)) from the experiment site corresponding to the growing season dates. Missing  $S_t$  was found using the National Solar Radiation Database ([http://rredc.nrel.gov/solar/old\\_data/nsrdb/](http://rredc.nrel.gov/solar/old_data/nsrdb/)) or the interannual variability data available through NASA SSE (<https://eosweb.larc.nasa.gov/cgi-bin/sse/sse.cgi>). A genetic component was also included in the analyses and was represented by the year of release (YOR) for each variety for which  $\epsilon_c$  was calculated. Varieties included in the analyses were listed by crop and subgroup (Supplemental Table S2). If an actual YOR was not reported in the literature or the Germplasm Resources Information Network (GRIN) database (National Genetic Resources Program, USDA/ARS), it was stated as the earliest mention in the literature using searches in both Web of Science (ISI, Philadelphia, PA, USA) and Google Scholar. Plant density was also included for maize analyses, both with and without YOR, since significant increases in yield have been correlated with increasing stand density (Duvick, 2005). Groups were assigned within rice and

wheat to further investigate means within crops (Table I). The ranges of each independent variable within each crop species and subgroup for the corresponding analyses were listed (Supplemental Table S3).

## **Analyses**

All statistical analyses were conducted using Statistical Analysis Software (SAS, ver. 9.3, SAS Institute, Cary, NC, USA).  $\epsilon_c$  means were calculated using an ANOVA (Proc GLM), and differences were considered significant at  $p < 0.1$ . Prior to conducting multiple regression analyses, general relationships between individual independent variables and  $\epsilon_c$  were determined in major crop species. Proc REG was used to determine if relationships were linear or quadratic using the lowest Akaike information criterion (AIC), and to eliminate influential points, the Cook's  $d$  metric was used. Next, Proc CORR was used to test for correlation between the independent variables where relationships greater than 0.8 were considered severe. Variance inflation factors were also determined (Proc REG) with the criterion that values greater than 10 also indicated severe correlation. Although significant correlation based on the metrics stated above was not present among any of the independent variables within each crop dataset, partial correlation coefficients were also determined (Proc CORR) for later comparison with multiple regression results (Supplemental Table S4). Multiple regression analyses were conducted on  $\epsilon_c$  versus the independent variables of breeding (YOR) and environmental factors ( $[\text{CO}_2]$ ,  $S_t$ ,  $T$ , and  $\text{H}_2\text{O}$ ; Proc REG) to determine which factors best explained the variation in  $\epsilon_c$ . The lowest corrected AIC ( $\text{AIC}_c$ ) score, which adjusted for sample size and was determined from AIC values, was used to identify the best model and rank the individual variables included in the final model. Sample size was drastically reduced in many of the crops when  $\text{H}_2\text{O}$  was included in the model since limited studies reported irrigation amounts. Results were therefore reported for analyses without  $\text{H}_2\text{O}$  unless sample size was reduced by less than 10% with  $\text{H}_2\text{O}$  in the model. This eliminated the only quadratic relationship (rice  $\epsilon_c$  versus  $\text{H}_2\text{O}$ ) from the analyses, resulting in only linear relationships between  $\epsilon_c$  and the independent variables. The food crops with positive YOR regression coefficients from multiple regression analyses were used to estimate the current  $\epsilon_c$  in 2014, then project the approximate amount of time needed for each crop or subgroup  $\epsilon_c$  to double and to reach the respective theoretical maxima for  $\text{C}_4$  and  $\text{C}_3$  plants. This was assuming no changes in climate, breeding intensity, or other factors.

## Literature Cited

- Ainsworth EA, Davey PA, Bernacchi CJ, Dermody OC, Heaton EA, Moore DJ, Morgan PB, Naidu SL, Yoo Ra H-S, Zhu X-G, et al.** (2002) A meta-analysis of elevated [CO<sub>2</sub>] effects on soybean (*Glycine max*) physiology, growth and yield. *Glob Chang Biol* **8**: 695–709
- Duvick DN** (2005) Genetic progress in yield of United States maize (*Zea mays* L.). *Maydica* **50**: 193–202
- Gower ST, Kucharik CJ, Norman JM** (1999) Direct and indirect estimation of leaf area index,  $f_{\text{APAR}}$ , and net primary production of terrestrial ecosystems. *Remote Sens Environ* **70**: 29–51
- Monteith JL** (1994) Validity of the correlation between intercepted radiation and biomass. *Agric For Meteorol* **68**: 213–220
- Sinclair TR, Muchow RC** (1999) Radiation use efficiency. *Adv Agron* **65**: 215–265
- Slattery RA, Ainsworth EA, Ort DR** (2013) A meta-analysis of responses of canopy photosynthetic conversion efficiency to environmental factors reveals major causes of yield gap. *J Exp Bot* **64**: 3723–3733

**Supplementary Table 1.** Data sources used in  $\epsilon_c$  analyses.

**Abbate PE, Andrade FH, Bariffi JH, Berardocco HG, Inza VH, Marturano F** (1998) Grain yield increase in recent Argentine wheat cultivars. *Crop Sci* **38**: 1203–1209

**Abbate PE, Andrade FH, Culot JP** (1995) The effects of radiation and nitrogen on number of grains in wheat. *J Agric Sci* **124**: 351–360

**Acreche MM, Briceño-Félix G, Martín Sánchez JA, Slafer GA** (2009) Radiation interception and use efficiency as affected by breeding in Mediterranean wheat. *Field Crop Res* **110**: 91–97

**Addisu M, Snape JW, Simmonds JR, Gooding MJ** (2009) Effects of reduced height (*Rht*) and photoperiod insensitivity (*Ppd*) alleles on yield of wheat in contrasting production systems. *Euphytica* **172**: 169–181

**Ahmad A, Iqbal S, Ahmad S, Khaliq T, Nasim W, Husnain Z, Hussain A, Hoogenboom G** (2009) Seasonal growth, radiation interception, its conversion efficiency and biomass production of *Oryza sativa* L. under diverse agro-environments in Pakistan. *Pakistan J Bot* **41**: 1241–1257

**Andrade FH** (1995) Analysis of growth and yield of maize, sunflower and soybean grown at Balcarce, Argentina. *Field Crop Res* **41**: 1–12

**Andrade FH, Uhart SA, Arguissain GG, Ruiz RA** (1992) Radiation use efficiency of maize grown in a cool area. *Field Crop Res* **28**: 345–354

**Andrade FH, Uhart SA, Cirilo A** (1993) Temperature affects radiation use efficiency in maize. *Field Crop Res* **32**: 17–25

**Anwar MR, McKenzie BA, Hill GD** (2004) The effect of irrigation and sowing date on crop yield and yield components of Kabuli chickpea (*Cicer arietinum* L.) in a cool-temperate subhumid climate. *J Agric Sci* **141**: 259–271

**Asrar G, Hipps LE, Kanemasu ET** (1984) Assessing solar energy and water use efficiencies in winter wheat: a case study. *Agric For Meteorol* **31**: 47–58

**Awal MA, Koshi H, Ikeda T** (2006) Radiation interception and use by maize/peanut intercrop canopy. *Agric For Meteorol* **139**: 74–83

**Awal MA, Ikeda T** (2003) Effect of elevated soil temperature on radiation-use efficiency in peanut stands. *Agric For Meteorol* **118**: 63–74

**Ayaz S, McKenzie BA, McNeil DL, Hill GD** (2004) Light interception and utilization of four grain legumes sown at different plant populations and depths. *J Agric Sci* **142**: 297–308

- Barker S, Dennett MD** (2013) Effect of density, cultivar and irrigation on spring sown monocrops and intercrops of wheat (*Triticum aestivum* L.) and faba beans (*Vicia faba* L.). *Eur J Agron* **51**: 108–116
- Beale CV, Long SP** (1995) Can perennial C<sub>4</sub> grasses attain high efficiencies of radiant energy conversion in cool climates ? *Plant Cell Environ* **18**: 641–650
- Bell MJ, Roy RC, Tollenaar M, Michaels TE** (1994) Importance of variation in chilling tolerance for peanut genotypic adaptation to cool, short-season environments. *Crop Sci* **34**: 1030-1039
- Bell MJ, Wright GC, Harch GR** (1993) Environmental and agronomic effects on the growth of four peanut cultivars in a sub-tropical environment. I. Dry matter accumulation and radiation use efficiency. *Exp Agric* **29**: 473–490
- Bingham IJ, Blake J, Foulkes MJ, Spink J** (2007) Is barley yield in the UK sink limited? *Field Crop Res* **101**: 198–211
- Birch C, Hammer G, Rickert K** (1999) Dry matter accumulation and distribution in five cultivars of maize (*Zea mays*): relationships and procedures for use in crop modelling. *Aust J Agric Res* **50**: 513–527
- Bolaños J, Edmeades GO** (1993) Eight cycles of selection for drought tolerance in lowland tropical maize. I. Responses in grain yield, biomass, and radiation utilization. *Field Crop Res* **31**: 233–252
- Boonjung H, Fukai S** (1996) Effects of soil water deficit at different growth stages on rice growth and yield under upland conditions. 1. Growth during drought. *Field Crop Res* **48**: 37–45
- Bouman BAM, Yang X, Wang H, Wang Z, Zhao J, Chen B** (2006) Performance of aerobic rice varieties under irrigated conditions in North China. *Field Crop Res* **97**: 53–65
- Bullard MJ, Heath MC, Nixon PMI** (1995) Shoot growth, radiation interception and dry matter production and partitioning during the establishment phase of *Miscanthus sinensis* ‘Giganteus’ grown at two densities in the UK. *Ann Appl Biol* **126**: 365–378
- Bustos DV, Hasan AK, Reynolds MP, Calderini DF** (2013) Combining high grain number and weight through a DH-population to improve grain yield potential of wheat in high-yielding environments. *Field Crop Res* **145**: 106–115
- Calderini DF, Dreccer MF, Slafer GA** (1997) Consequences of breeding on biomass, radiation interception and radiation-use efficiency in wheat. *Field Crop Res* **52**: 271–281
- Capristo PR, Rizzalli RH, Andrade FH** (2007) Ecophysiological yield components of maize hybrids with contrasting maturity. *Agron J* **99**: 1111-1118

- Cavero J, Zaragoza C, Suso ML, Pardo A** (1999) Competition between maize and *Datura stramonium* in an irrigated field under semi-arid conditions. *Weed Res* **39**: 225–240
- Caviglia OP, Sadras VO** (2001) Effect of nitrogen supply on crop conductance, water- and radiation-use efficiency of wheat. *Field Crop Res* **69**: 259–266
- Caviglia OP, Sadras VO, Andrade FH** (2004) Intensification of agriculture in the south-eastern Pampas. *Field Crop Res* **87**: 117–129
- Ceotto E, Di Candilo M, Castelli F, Badeck F-W, Rizza F, Soave C, Volta A, Villani G, Marletto V** (2013) Comparing solar radiation interception and use efficiency for the energy crops giant reed (*Arundo donax* L.) and sweet sorghum (*Sorghum bicolor* L. Moench). *Field Crop Res* **149**: 159–166
- Chapman SC, Ludlow MM, Blamey FPC, Fischer KS** (1993) Effect of drought during early reproductive development on growth of cultivars of groundnut (*Arachis hypogaea* L.). I. Utilization of radiation and water during drought. *Field Crop Res* **32**: 193–210
- Collino DJ, Dardanelli JL, Sereno R, Racca RW** (2001) Physiological responses of argentine peanut varieties to water stress. Light interception, radiation use efficiency and partitioning of assimilates. *Field Crop Res* **70**: 177–184
- Cosentino SL, Patanè C, Sanzone E, Copani V, Foti S** (2007) Effects of soil water content and nitrogen supply on the productivity of *Miscanthus × giganteus* Greef et Deu. in a Mediterranean environment. *Ind Crops Prod* **25**: 75–88
- Curt MD, Fernandez J, Martinez M** (1998) Productivity and radiation use efficiency of sweet sorghum (*Sorghum bicolor* (L.) Moench) cv. Keller in central Spain. *Biomass and Bioenergy* **14**: 169–178
- Daughtry CST, Gallo KP, Goward SN, Prince SD, Kustas WP** (1992) Spectral estimates of absorbed radiation and phytomass production in corn and soybean canopies. *Remote Sens Environ* **39**: 141–152
- Demagante AL, Vander Zaag P** (1988) Potato (*Solanum* spp.) in an isohyperthermic environment II. Response to planting date. *F Crop Res* **19**: 153–166
- Dercas N, Liakatas A** (2006) Water and radiation effect on sweet sorghum productivity. *Water Resour Manag* **21**: 1585–1600
- De Silva ALC, De Costa WAJM** (2012) Growth and radiation use efficiency of sugarcane under irrigated and rain-fed conditions in Sri Lanka. *Sugar Tech* **14**: 247–254
- Dohleman FG, Long SP** (2009) More productive than maize in the Midwest: How does *Miscanthus* do it? *Plant Physiol* **150**: 2104–2115

- Earl HJ, Davis RF** (2003) Effect of drought stress on leaf and whole canopy radiation use efficiency and yield of maize. *Agron J* **95**: 688–696
- Edwards JT, Purcell LC, Vories ED** (2005) Light interception and yield potential of short-season maize (*Zea mays* L.) hybrids in the Midsouth. *Agron J* **234**: 225–234
- Fletcher AL, Johnstone PR, Chakwizira E, Brown HE** (2013) Radiation capture and radiation use efficiency in response to N supply for crop species with contrasting canopies. *Field Crop Res* **150**: 126–134
- Fletcher AL, Moot DJ, Stone PJ** (2008) Radiation use efficiency and leaf photosynthesis of sweet corn in response to phosphorus in a cool temperate environment. *Eur J Agron* **29**: 88–93
- Foulkes MJ, Scott RK, Sylvester-Bradley R** (2001) The ability of wheat cultivars to withstand drought in UK conditions: resource capture. *J Agric Sci* **137**: 1–16
- Gallo KP, Daughtry T** (1993) Errors in measuring absorbed radiation and computing crop radiation use efficiency. *Agron J* **85**: 1222–1228
- Gao Y, Duan A, Qiu X, Sun J, Zhang J, Liu H, Wang H** (2010) Distribution and use efficiency of photosynthetically active radiation in strip intercropping of maize and soybean. *Agron J* **102**: 1149–1157
- Giauffret C, Bonhomme R, Derieux M** (1997) Heterosis in maize for biomass production, leaf area establishment, and radiation use efficiency under cool spring conditions. *Maydica* **42**: 13–19
- Giauffret C, Dorvillez D, Derieux M** (1991) Conversion of intercepted radiation into aerial dry biomass for three maize genotypes: influence of plant density. *Maydica* **36**: 25–27
- Gooding MJ, Pinyosinwat A, Ellis RH** (2002) Responses of wheat grain yield and quality to seed rate. *J Agric Sci* **138**: 317–331
- Goyne PJ, Milroy SP, Lilley JM, Hare JM** (1993) Radiation interception, radiation use efficiency and growth of barley cultivars. *Aust J Agric Res* **44**: 1351–1366
- Green CF** (1989) Genotypic differences in the growth of *Triticum aestivum* in relation to absorbed solar radiation. *Field Crop Res* **19**: 285–295
- Green CF** (1987) Nitrogen nutrition and wheat growth in relation to absorbed solar radiation. *Agric For Meteorol* **41**: 207–248
- Haro RJ, Dardanelli JL, Otegui ME, Collino DJ** (2008) Seed yield determination of peanut crops under water deficit: Soil strength effects on pod set, the source–sink ratio and radiation use efficiency. *Field Crop Res* **109**: 24–33

- Harris D, Natarajan M, Willey RW** (1987) Physiological basis for yield advantage in a sorghum/groundnut intercrop exposed to drought 1. Dry-matter production, yield, and light interception. *Field Crop Res* **17**: 259–272
- Haverkort AJ, Bicamumpaka M** (1986) Correlation between intercepted radiation and yield of potato infested by *Phytophthora infestans* in central Africa. *Netherlands J Plant Pathol* **92**: 239–247
- Haverkort AJ, Boerma M, Velema R, Van de Waart M** (1992) The influence of drought and cyst nematodes on potato growth. 4. Effects on crop growth under field conditions of four cultivars differing in tolerance. *Netherlands J Plant Pathol* **98**: 179–191
- Heaton EA, Dohleman FG, Long SP** (2008) Meeting US biofuel goals with less land: the potential of *Miscanthus*. *Glob Chang Biol* **14**: 2000–2014
- Horie T, Ohnishi M, Angus JF, Lewin LG, Tsukaguchi T, Matano T** (1997) Physiological characteristics of high-yielding rice inferred from cross-location experiments. *Field Crop Res* **52**: 55–67
- Hughes G, Keatinge JDH** (1983) Solar radiation interception, dry matter production and yield in pigeonpea (*Cajanus cajan* (L.) Millspaugh). *Field Crop Res* **6**: 171–178
- Hughes G, Keatinge JDH, Cooper PJM, Dee NF** (1987) Solar radiation interception and utilization by chickpea (*Cicer arietinum* L.) crops in northern Syria. *J Agric Sci* **108**: 419–424
- Hughes G, Keatinge JDH, Scott SP** (1981) Pigeon pea as a dry season crop in Trinidad, West Indies II- Interception and utilization of solar radiation. *Trop Agric* **58**: 191–199
- Inthapan P, Fukai S** (1988) Growth and yield of rice cultivars under sprinkler irrigation in south-eastern Queensland. 2. Comparison with maize and grain sorghum under wet and dry conditions. *Aust J Exp Agric* **28**: 243–248
- Iseki K, Homma K, Jongdee B** (2011) Oxidative stress and its relation to radiation use efficiency in rice growing under rainfed condition in northeast Thailand. *Proc Seventh ACSA Conf* 61–65
- Jadhav JD, Shewale MR, Mokashi DD, Gajkwad CB, Patil JD** (1995) Radiation-use efficiency in sole and intercropping systems. *Indian J Agric Sci* **65**: 522–524
- Jamieson PD, Martin RJ, Francis GS, Wilson DR** (1995) Drought effects on biomass production and radiation-use efficiency in barley. *Field Crop Res* **43**: 77–86
- Jefferies RA, MacKerron DKL** (1989) Radiation interception and growth of irrigated and droughted potato (*Solanum tuberosum*). *F Crop Res* **22**: 101–112

- Jørgensen U, Mortensen J, Ohlsson C** (2003) Light interception and dry matter conversion efficiency of miscanthus genotypes estimated from spectral reflectance measurements. *New Phytol* **157**: 263–270
- Kamoshita A, Fukai S, Muchow RC, Cooper M** (1998) Sorghum hybrid differences in grain yield and nitrogen concentration under low soil nitrogen availability II. Hybrids with contrasting phenology. *Aust J Agric Res* **49**: 1277–1286
- Katsura K, Maeda S, Horie T, Shiraiwa T** (2007) Analysis of yield attributes and crop physiological traits of Liangyoupeijiu, a hybrid rice recently bred in China. *Field Crop Res* **103**: 170–177
- Katsura K, Maeda S, Lubis I, Horie T, Cao W, Shiraiwa T** (2008) The high yield of irrigated rice in Yunnan, China. *Field Crop Res* **107**: 1–11
- Katsura K, Okami M, Mizunuma H, Kato Y** (2010) Radiation use efficiency, N accumulation and biomass production of high-yielding rice in aerobic culture. *Field Crop Res* **117**: 81–89
- Kemalian AR, Stockle CO, Huggins DR** (2004) Variability of barley radiation-use efficiency. *Crop Sci* **44**: 1662–1672
- Khurana SC, McLaren JS** (1982) The influence of leaf area, light interception and season on potato growth and yield. *Potato Res* **25**: 329–342
- Kiniry J, Landivar J, Witt M, Gerik T, Caverro J, Wade L** (1998) Radiation-use efficiency response to vapor pressure deficit for maize and sorghum. *Field Crop Res* **56**: 265–270
- Kiniry JR** (1994) Radiation-use efficiency and grain yield of maize competing with johnsongrass. *Agron J* **86**: 554–557
- Kiniry JR, Anderson LC, Johnson M-VV, Behrman KD, Brakie M, Burner D, Cordsiemon RL, Fay PA, Fritschi FB, Houx JH, et al.** (2012a) Perennial biomass grasses and the Mason–Dixon line: Comparative productivity across latitudes in the southern Great Plains. *Bioenergy Res* **6**: 276–291
- Kiniry JR, Johnson M-VV, Bruckerhoff SB, Kaiser JU, Cordsiemon RL, Harmel RD** (2012b) Clash of the titans: Comparing productivity via radiation use efficiency for two grass giants of the biofuel field. *Bioenergy Res* **5**: 41–48
- Kiniry JR, Jones CA, O’Toole JC, Blanchet R, Cabelguenne M, Spanel DA** (1989) Radiation-use efficiency in biomass accumulation prior to grain-filling for five grain-crop species. *Field Crop Res* **20**: 51–64
- Kiniry JR, McCauley G, Xie Y, Arnold JG** (2001) Rice parameters describing crop performance of four U. S. cultivars. *Agron J* **93**: 1354–1361

- Kiniry JR, Simpson CE, Schubert AM, Reed JD** (2005) Peanut leaf area index, light interception, radiation use efficiency, and harvest index at three sites in Texas. *Field Crop Res* **91**: 297–306
- Kiniry JR, Tischler CR, Van Esbroeck GA** (1999) Radiation use efficiency and leaf CO<sub>2</sub> exchange for diverse C<sub>4</sub> grasses. *Biomass and Bioenergy* **17**: 95–112
- Kooman PL, Fahem M, Tegera P, Haverkort AJ** (1996) Effects of climate on different potato genotypes 1. Radiation interception, total and tuber dry matter production. *Eur J Agron* **5**: 193–205
- Li D, Tang Q, Zhang Y, Qin J, Li H, Chen L, Yang S, Zou Y, Peng S** (2012) Effect of nitrogen regimes on grain yield, nitrogen utilization, radiation use efficiency, and sheath blight disease intensity in super hybrid rice. *J Integr Agric* **11**: 134–143
- Li HL, Luo Y, Ma JH** (2011) Radiation-use efficiency and the harvest index of winter wheat at different nitrogen levels and their relationships to canopy spectral reflectance. *Crop Pasture Sci* **62**: 208–217
- Li L, Bueckert RA, Gan Y, Warkentin T** (2008) Light interception and radiation use efficiency of fern- and unifoliate-leaf chickpea cultivars. *Can J Plant Sci* **88**: 1025–1034
- Li Q, Liu M, Zhang J, Dong B, Bai Q** (2009) Biomass accumulation and radiation use efficiency of winter wheat under deficit irrigation regimes. *Plant Soil Environ* **55**: 85–91
- Lindquist JL, Arkebauer TJ, Walters DT, Cassman KG, Dobermann A** (2005) Maize radiation use efficiency under optimal growth conditions. *Agron J* **97**: 72–78
- Liu T, Song F, Liu S, Zhu X** (2012) Light interception and radiation use efficiency response to narrow-wide row planting patterns in maize. *Aust J Crop Sci* **6**: 506–513
- Louarn G, Chenu K, Fournier C, Andrieu B, Giauffret C** (2008) Relative contributions of light interception and radiation use efficiency to the reduction of maize productivity under cold temperatures. *Funct Plant Biol* 885–899
- Madakadze IC, Steward K, Peterson PR, Coulman BE, Samson R, Smith DL** (1998) Light interception, use-efficiency and energy yield of switchgrass (*Panicum virgatum* L.) grown in a short season area. *Biomass and Bioenergy* **15**: 475–482
- Major D, Beasley B, Hamilton R** (1991) Effect of maize maturity on radiation-use efficiency. *Agron J* **83**: 895–903
- Major DJ, Janzen HH, Sadasivaiah RS, Carefoot JM** (1992) Morphological characteristics of wheat associated with high productivity. *Can J Plant Sci* **72**: 689–698

- Manderscheid R, Burkart S, Bramm A, Weigel H-J** (2003) Effect of CO<sub>2</sub> enrichment on growth and daily radiation use efficiency of wheat in relation to temperature and growth stage. *Eur J Agron* **19**: 411–425
- Manderscheid R, Erbs M, Weigel H-J** (2014) Interactive effects of free-air CO<sub>2</sub> enrichment and drought stress on maize growth. *Eur J Agron* **52**: 11–21
- Manderscheid R, Pacholski A, Frühauf C, Weigel H-J** (2009) Effects of free air carbon dioxide enrichment and nitrogen supply on growth and yield of winter barley cultivated in a crop rotation. *Field Crop Res* **110**: 185–196
- Manrique LA, Kiniry JR, Hodges T, Axness DS** (1991) Dry matter production and radiation interception of potato. *Crop Sci* **31**: 1044–1049
- Maqsood M, Shehzad MA, Sarwar MA** (2012) Impact of different moisture regimes and nitrogen rates on yield and yield attributes of maize (*Zea mays* L.). *African J Biotechnol* **11**: 8449–8455
- Marshall B, Willey RW** (1983) Radiation interception and growth in an intercrop of pearl millet/groundnut. *Field Crop Res* **7**: 141–160
- Massignam AM, Chapman SC, Hammer GL, Fukai S** (2009) Physiological determinants of maize and sunflower grain yield as affected by nitrogen supply. *Field Crop Res* **113**: 256–267
- Mastrorilli M, Kate N, Rana G, Steduto I** (1995) Sweet sorghum in Mediterranean climat : radiation use and biomass water use efficiencies. *Ind Crops Prod* **3**: 253–260
- Miralles DJ, Slafer GA** (1997) Radiation interception and radiation use efficiency of near-isogenic wheat lines with different height. *Euphytica* **97**: 201–208
- Muchow RC** (1985) An analysis of the effects of water deficits on grain legumes grown in a semi-arid tropical environment in terms of radiation interception and its efficiency of use. *Field Crop Res* **11**: 309–323
- Muchow RC** (1989) Comparative productivity of maize, sorghum and pearl millet in a semi-arid tropical environment II. Effect of water deficits. *Field Crop Res* **20**: 207–219
- Muchow RC, Davis R** (1988) Effect of nitrogen supply on the comparative productivity of maize and sorghum in a semi-arid tropical environment II. Radiation interception and biomass accumulation. *Field Crop Res* **18**: 17–30
- Muchow RC, Evensen CI, Osgood R V** (1997) Yield accumulation in irrigated sugarcane: II. Utilization of intercepted radiation. *Agron J* **89**: 646–652

- Muchow RC, Sinclair TR** (1994) Nitrogen response of leaf photosynthesis and canopy radiation use efficiency in field-grown maize and sorghum. *Crop Sci* **34**: 721–727
- Muchow RC, Spillman MF, Wood AW, Thomas MR** (1994) Radiation interception and biomass accumulation in a sugarcane crop grown under irrigated tropical conditions. *Aust J Agric Res* **45**: 37–49
- Muurinen S, Peltonen-Sainio P** (2006) Radiation-use efficiency of modern and old spring cereal cultivars and its response to nitrogen in northern growing conditions. *Field Crop Res* **96**: 363–373
- Nam NH, Subbarao GV, Chauhan S, Johansen C** (1998) Importance of canopy attributes in determining dry matter accumulation of pigeonpea under contrasting moisture regimes. *Crop Sci* **38**: 955–961
- Narayanan S, Aiken RM, Vara Prasad P V, Xin Z, Yu J** (2013) Water and radiation use efficiencies in sorghum. *Agron J* **105**: 649–656
- Natarajan M, Chickpea MSR** (1994) Sowing date and maize productivity: I. Crop growth and dry matter partitioning. *Crop Sci* **34**: 1039–1043
- Olesen JE, Jorgensen LN, Mortensen J V** (2000) Irrigation strategy, nitrogen application and fungicide control in winter wheat on a sandy soil. II. Radiation interception and conversion. *J Agric Sci* **134**: 13–23
- Olesen JE, Jørgensen LN, Petersen J, Mortensen JV.** (2003) Effects of rates and timing of nitrogen fertilizer on disease control by fungicides in winter wheat. 2. Crop growth and disease development. *J Agric Sci* **140**: 15–29
- Ong CK, Subrahmanyam P, Khan AAH** (1991) The microclimate and productivity of a groundnut/millet intercrop during the rainy season. *Agric For Meteorol* **56**: 49–66
- Opoku-Ameyaw K, Harris PM** (2001) Intercropping potatoes in early spring in a temperate climate. 2. Radiation utilization. *Potato Res* **44**: 63–74
- Osaki M** (1995) Comparison of productivity between tropical and temperate maize. *Soil Sci Plant Nutr* **41**: 451–459
- Otegui ME, Nicolini MG, Ruiz RA, Dodds PA** (1995) Sowing date effects on grain yield components for different maize genotypes. *Agron J* **87**: 29–33
- Plenet D, Mollier A, Pellerin S** (2000) Growth analysis of maize field crops under phosphorus deficiency. II. Radiation-use efficiency, biomass accumulation and yield components. *Plant Soil* **224**: 259–272

- Rattalino Edreira JI, Otegui ME** (2012) Heat stress in temperate and tropical maize hybrids: Differences in crop growth, biomass partitioning and reserves use. *Field Crop Res* **130**: 87–98
- Reynolds M, Calderini D, Condon A, Vargas M** (2007) Association of source/sink traits with yield, biomass and radiation use efficiency among random sister lines from three wheat crosses. *J Agric Sci* **145**: 3–16
- Rinaldi M, Garofalo P** (2011) Radiation-use efficiency of irrigated biomass sorghum in a Mediterranean environment. *Crop Pasture Sci* **62**: 830–839
- Robertson MJ, Giunta F** (1994) Responses of spring wheat exposed to pre-anthesis water stress. *Aust J Agric Res* **45**: 19–35
- Robertson MJ, Silim S, Chauhan YS, Ranganathan R** (2001) Predicting growth and development of pigeonpea: biomass accumulation and partitioning. *Field Crop Res* **70**: 89–100
- Robertson MJ, Wood AW, Muchow RC** (1996) Growth of sugarcane under high input conditions in tropical Australia. I. Radiation use, biomass accumulation and partitioning. *Field Crop Res* **48**: 11–25
- Rodriguez D, Andrade FH, Goudriaan J** (2000) Does assimilate supply limit leaf expansion in wheat grown in the field under low phosphorus availability? *Field Crop Res* **67**: 227–238
- Rosenthal WD, Gerik TJ, Wade LJ** (1993) Radiation-use efficiency among grain sorghum cultivars and plant densities. *Agron J* **85**: 703–705
- Sadras VO, O’Leary GJ, Roget DK** (2005) Crop responses to compacted soil: capture and efficiency in the use of water and radiation. *Field Crop Res* **91**: 131–148
- Saluzzo JA, Echeverria HE, Andrade FH, Huarte M** (1999) Nitrogen nutrition of potato cultivars differing in maturity. *J Agron Crop Sci* **183**: 157–165
- Serrano L, Filella I, Penuelas J** (2000) Remote sensing of biomass and yield of winter wheat under different nitrogen supplies. *Crop Sci* **40**: 723–731
- Shah SFA, McKenzie BA, Gaunt RE, Marshall JW, Frampton CM** (2004) Effect of early blight (*Alternaria solani*) and different nitrogen inputs on radiation interception, radiation use efficiency, and total dry matter production in potatoes (*Solanum tuberosum*) grown in Canterbury, New Zealand. *New Zeal J Crop Hortic Sci* **32**: 263–272
- Shearman VJ, Scott RK, Foulkes MJ** (2005) Physiological processes associated with wheat yield progress in the UK. *Crop Sci* **45**: 175–185

- Singels A, Smit MA.** (2009) Sugarcane response to row spacing-induced competition for light. *Field Crop Res* **113**: 149–155
- Singer JW, Meek DW, Sauer TJ, Prueger JH, Hatfield JL** (2011) Variability of light interception and radiation use efficiency in maize and soybean. *Field Crop Res* **121**: 147–152
- Singer JW, Sauer TJ, Blaser BC, Meek DW** (2007) Radiation use efficiency in dual winter cereal–forage production systems. *Agron J* **99**: 1175–1179
- Singh P, Sri Rama YV** (1989) Influence of water deficit on transpiration and radiation use efficiency of chickpea (*Cicer arietinum* L.). *Agric For Meteorol* **48**: 317–330
- Sivakumar MVK, Virmani SM** (1984) Crop productivity in relation to interception of photosynthetically active radiation. *Agric For Meteorol* **31**: 131–141
- Slafer GA, Andrade FH, Satorre EH** (1990) Genetic-improvement effects on pre-anthesis physiological attributes related to wheat grain-yield. *Field Crop Res* **23**: 255–263
- Steduto P, Albrizio R** (2005) Resource use efficiency of field-grown sunflower, sorghum, wheat and chickpea. *Agric For Meteorol* **130**: 269–281
- Steiner L** (1986) Dryland grain sorghum water use, light interception, and growth responses to planting geometry. *Agron J* **78**: 720–726
- Stirling CM, Williams JH, Black CR, Ong CK** (1990) The effect of timing of shade on development, dry matter production and light-use efficiency in groundnut (*Arachis hypogaea* L.) under field conditions. *Aust J Agric Res* **41**: 633–644
- Stone PJ, Wilson DR, Reid JB, Gillespie RN** (2001) Water deficit effects on sweet corn. I. Water use, radiation use efficiency, growth, and yield. *Aust J Agric Res* **52**: 103–113
- Strullu L, Cadoux S, Beaudoin N, Jeuffroy M-H** (2013) Influence of belowground nitrogen stocks on light interception and conversion of *Miscanthusxgiganteus*. *Eur J Agron* **47**: 1–10
- Sun H, Shao L, Chen S, Wang Y, Zhang X** (2013) Effects of sowing time and rate on crop growth and radiation use efficiency of winter wheat in the North China Plain. *Int J Plant Prod* **7**: 117–138
- Tesfaye K, Walker S, Tsubo M** (2006) Radiation interception and radiation use efficiency of three grain legumes under water deficit conditions in a semi-arid environment. *Eur J Agron* **25**: 60–70
- Thomas, Fukai S** (1995) Growth and yield response of barley and chickpea to water stress under three environments in southeast Queensland. I. Light interception, crop growth and grain yield. *Aust J Agric Res* **46**: 17–33

- Toyota M, Shiotsu F, Bian J, Morokuma M, Kusutani A** (2010) Effects of reduction in plant height induced by chlormequat on radiation interception and radiation-use efficiency in wheat in southwest Japan. *Plant Prod Sci* **13**: 67–73
- Tripathi P, Tomar SK, Adhar S** (2000) Effect of moisture regimes and genotypes on biomass accumulation, radiation interception and its use in wheat (*Triticum aestivum*). *Indian J Agric Sci* **70**: 97–101
- Tsubo M, Walker S** (2004) Shade effects on *Phaseolus vulgaris* L. intercropped with *Zea mays* L. under well-watered conditions. *J Agron Crop Sci* **190**: 168–176
- Tsubo M, Walker S, Mukhala E** (2001) Comparisons of radiation use efficiency of mono-intercropping systems with different row orientations. *Field Crop Res* **71**: 17–29
- Uhart SA, Andrade FH** (1995) Nitrogen deficiency in maize: I. Effects on crop growth, development, dry matter partitioning, and kernel set. *Crop Sci* **35**: 1376–1383
- Van Delden A** (2001) Yield and growth components of potato and wheat under organic nitrogen management. *Agron J* **93**: 1370–1385
- Verheul MJ, Picatto C, Stamp P** (1996) Growth and development of maize (*Zea mays* L.) seedlings under chilling conditions in the field. *Eur J Agron* **5**: 31–43
- Watiki JM, Fukai S, Banda JA, Keating BA** (1993) Radiation interception and growth of maize/cowpea intercrop as affected by maize plant density and cowpea cultivar. *Field Crop Res* **35**: 123–133
- Westgate ME, Forcella F, Reicosky DC, Somsen J** (1997) Rapid canopy closure for maize production in the northern US corn belt: Radiation-use efficiency and grain yield. *Field Crop Res* **49**: 249–258
- Whaley BJM, Sparkes DL, Foulkes MJ, Spink JH, Semere T, Scott RK** (2000) The physiological response of winter wheat to reductions in plant density. *Ann Appl Biol* **137**: 165–177
- Whitfield DM, Smith CJ** (1989) Effects of irrigation and nitrogen on growth, light interception and efficiency of light conversion in wheat. *Field Crop Res* **20**: 279–295
- Williams JH, Rao RCN, Dougbedji F, Talwar HS** (1996) Radiation interception and modelling as an alternative to destructive samples in crop growth measurements. *Ann Appl Biol* **129**: 151–160
- Woodard KR, Prine GM, Bachrein S** (1993) Solar energy recovery by elephantgrass, energycane, and elephantmillet canopies. *Crop Sci* **33**: 824–830

- Worku W, Demisie W** (2012) Growth, light interception and radiation use efficiency response of pigeon pea (*Cajanus cajan*) to planting density in southern Ethiopia. *J Agron* **11**: 85–93
- Wright GC, Hammer GL** (1994) Distribution of nitrogen and radiation use efficiency in peanut canopies. *Aust J Agric Res* **45**: 565–574
- Yi L, Shenjiao Y, Shiqing L, Xinping C, Fang C** (2010) Growth and development of maize (*Zea mays* L.) in response to different field water management practices: Resource capture and use efficiency. *Agric For Meteorol* **150**: 606–613
- Yunusa IAM, Siddique KHM, Belford RK, Karimi MM** (1993) Effect of canopy structure on efficiency of radiation interception and use in spring wheat cultivars during the pre-anthesis period in a mediterranean-type environment. *Field Crop Res* **35**: 113–122
- Zhang L, van der Werf W, Bastiaans L, Zhang S, Li B, Spiertz JHJ** (2008) Light interception and utilization in relay intercrops of wheat and cotton. *Field Crop Res* **107**: 29–42
- Zhang Y, Tang Q, Zou Y, Li D, Qin J, Yang S, Chen L, Xia B, Peng S** (2009) Yield potential and radiation use efficiency of “super” hybrid rice grown under subtropical conditions. *Field Crop Res* **114**: 91–98

## Supplementary Table 2.

Varieties included in crop and subgroup analyses.

### Maize

|                   |                  |                  |                     |
|-------------------|------------------|------------------|---------------------|
| Adler 30X         | Dekalb DK688     | Hycorn 83        | Pioneer 3245        |
| B73 x Mo17        | Dekalb DK752     | Hyland HL2803    | Pioneer 335         |
| Barker            | Dekalb DK246     | INRA 150         | Pioneer 33A14       |
| Beck 65X          | Dekalb DK529     | Juanita          | Pioneer 33P67       |
| Beiyu288          | Dekalb Exp164    | King 1131        | Pioneer 3790        |
| Buck Aurora       | Dekalb XL72AA    | KW 1074          | Pioneer 3803        |
| Buck Austral      | Dekalb XL82      | KWS Domingo      | Pioneer 3901        |
| Cambel 78         | Deltapine G4673B | KWS Impacto      | Pioneer 3995        |
| Cargill PAG SX123 | DK-5219          | KWS Romario      | Pioneer Brand 35Y67 |
| Challenger        | Dow 2A120        | KWS Tandem       | Pioneer P3540       |
| CM 109            | Dow 2B710        | LG11             | Pioneer P37P73      |
| DEA               | Dow 2M545        | LP               | Poza Rica 7822      |
| Dekalb 2F11       | Eva              | LP x F2          | S5154               |
| Dekalb 3F23       | F2               | LP x F257        | SNK 2147            |
| Dekalb 3F24       | F244             | McCurdy 67-14    | SPS 240             |
| Dekalb 3S41       | F244 x F2        | Mo17             | Tuxpeño Sequía      |
| Dekalb 4F91       | F257             | Nidera Ax 599    | Volga               |
| Dekalb 4S80       | F257 x F244      | Nidera Ax 840    | Wis. Hybrid 110     |
| Dekalb 524        | F286             | Nidera XPA 73811 | Xianyu335           |
| Dekalb 61-69      | Funk G-4083      | NK PX9353        | Z15                 |
| Dekalb 636        | Hycorn 42        | NK PX9405        | Z7                  |
| Dekalb DK615      | Hycorn 53        | Penjalinan       | Zhengdan 958        |

### Sorghum

|                |               |                    |                      |
|----------------|---------------|--------------------|----------------------|
| <i>Grain</i>   | CSH-6         | Liang Tang Ai      | TX 7078              |
| 87151-3-4/QL36 | CSH-8         | PI 584085          | Tx378 x Tx430 Hybrid |
| Argence        | Dekalb DK55   | QL39/QL12          |                      |
| ATx378/RTx430  | DK46          | Triumph Two 64 Y-G | <i>Energy</i>        |
| ATx631/RTx2817 | Hybrid Ramada | TX 2862            | Biomass 133          |
| Cargill 4462   | IS 27111      | TX 399             | Keller               |
| Cargill 6670   | IS 27150      | TX 7000            | SF BMR Revolution    |

### Rice

|                    |                  |                 |                |
|--------------------|------------------|-----------------|----------------|
| <i>New Hybrids</i> | Liangyou 293     | Takanari        | Jefferson      |
| IR65564-44-2-2     | Liangyoupeijiu   | Yangdao 6       | Koshihikari    |
| IR68586-FA-CA-143  | WAB450-I-B-P-38- |                 | Labelle        |
| IRUBN030055-5-112  | HB               | <i>Japonica</i> | Lemont         |
| IRUBN030055-5-190  |                  | Akihikari       | Nipponbare     |
| IRUBN030055-5-87   | <i>Indica</i>    | Cocodrie        | Shinhakaburi   |
| IRUBN030056-10-    | Huanghuazhan     | Cypress         | Takenari       |
| 107                | Il-you 838       | HD297           |                |
| IRUBN030056-10-42  | IR72             | HD502           | <i>Basmati</i> |
| IRUBN030062-1-9    | Shanguichao      | IR43            | Basmati-2000   |
| IRUBN030063-9-4    | Shanyou 63       | IRAT109         | Super Basmati  |
| IRUBN030070-9-32   | Surin 1          | JD305           |                |

**Wheat***Spring*

Americano 26n  
 Attila  
 Axona  
 Bacanora  
 Bencubbin  
 Borlaug  
 Buck Manantial  
 Buck Nandu  
 Buck Pucara  
 Condor  
 Ente  
 Eureka FCS  
 Fielder  
 Gamenya  
 Granero INTA  
 Highbury  
 HY320  
 Invento-BAER  
 Kanred  
 Klein Favorito  
 Kulin  
 Leader

Manu  
 Maringa  
 Mexicali  
 Minaret  
 Neepawa  
 Oasis  
 Oslo  
 Owens  
 Pampa INTA  
 Pandora-INIA  
 PROINTA Federal  
 PROINTA Imperial  
 PROINTA Oasis  
 PROINTA Pigue  
 PROINTA Puntal  
 R143  
 Sanukinoyume 2000  
 Saracen  
 Sonalika  
 Tammi  
 Trigomax 200  
 Vinjett  
 Weebil

Yecora 70  
 Yitpi  
 Zhong

*Winter*

Anza  
 Aragon 03  
 Armada  
 Avalon  
 Brigadier  
 Centurk  
 Cockpit  
 Estrella  
 Florida  
 Galahad  
 Haven  
 HD 2285  
 Hedgehog  
 Hereward  
 HP 1633  
 Huntsman  
 Hussar  
 HUW 234

ID-2151  
 ID-2193  
 Isengrain  
 Kaskaskia  
 Kenong 9204  
 KN199  
 Maris Huntsman  
 Maris Widgeon  
 Marius  
 Mercia  
 Newton  
 Norman  
 Pane 247  
 Pepital  
 Rialto  
 Riband  
 Score  
 Siete Cerros  
 Soissons  
 Stetson  
 Virtue

**Barley**

Baronesse  
 Corvette  
 Gilbert  
 Grimmett

Inari  
 Kunnari  
 Olli  
 Pearl

Rolf  
 Scarlett  
 Steptoe  
 Theresa

Triumph  
 Uurainen

**Potato**

Agria  
 Alpha  
 Bintje  
 C14-343  
 Cara  
 Cosima  
 Darwina

Desiree  
 Diamant  
 DTO-2  
 Elles  
 Escort  
 Huinkul  
 Ilam Hardy

Jaerla  
 Junior  
 Katahdin  
 LT-1  
 Mailen  
 Maris Piper  
 Mentor

Pentland Crown  
 Premiere  
 Producent  
 Record Pentland Crown  
 Spunta

**Peanut**

ASEM 485 INTA  
 Chibahandachi  
 Chico  
 Early Bunch  
 Flavor Runner 458  
 Florman INTA  
 Florunner

Georgia Green  
 ICGV86031  
 ICGV86635  
 ICGV86707  
 Kadiri 3/Robut 33-1  
 Manfredi 393 INTA  
 Mani Pintar

McCubbin  
 OAC Garroy  
 OAC Ruby  
 OAC Tango  
 Q18801  
 Tamrun 96  
 Tifton-8

TMV2  
 TMV2NLM  
 VA910212  
 Virginia Bunch

**Soybean**

|              |           |              |               |
|--------------|-----------|--------------|---------------|
| 93705-34     | Clark     | IA 3023      | PI 471938     |
| 93705-36     | CNS       | Illini       | Pioneer 93B15 |
| A3901RR      | Coker 156 | INA          | Rend          |
| Adams        | Coker 368 | Jackson      | Resnik        |
| Adelphia     | Darby     | Ks4895       | Roanoke       |
| AK (Harrow)  | Davis     | L17          | Ross          |
| Apollo       | Durack    | Lee          | SCE 82-222    |
| Asgrow 3127  | Enrei     | Lincoln      | Shelby        |
| Asgrow A5959 | Essex     | Mandell      | Spry          |
| Benning      | Ford      | Manokin      | Stress Land   |
| Boggs        | Graham    | NC-Roy       | Wayne         |
| Brand 92M70  | H2L16     | NE3399       | Williams      |
| BRS Tracajá  | Hawkeye   | NTCPR94-5157 | Williams 82   |
| Buchanan     | Hsus-H116 | Omaha        | Woodworth     |
| Calland      | Hutcheson | PB-1         | Yudou 22      |
| Century      | IA 3010   | PI 416937    | Zane          |

**Chick Pea**

|          |            |          |         |
|----------|------------|----------|---------|
| Amethyst | Borwen     | Dwelley  | ILC-482 |
| Amit     | CDC ChiChi | Evans    | ILC-72  |
| Annigeri | CDC Xena   | ICC-4958 | Sanford |
| B-90     | CDC Yuma   | ILC-202  | Sultano |

**Pigeon Pea**

|                   |            |            |          |
|-------------------|------------|------------|----------|
| Chaguaramas Pearl | ICPL 84023 | ICPL 88026 | Royes    |
| ICP 15027         | ICPL 85010 | ICPL 88032 | UPAS 120 |
| ICP 7179          | ICPL 85037 | ICPL 88039 | UW26     |
| ICPL 1-6          | ICPL 87    | ICPL 89002 | UW17     |
| ICPL 83015        | ICPL 87091 | ICRISAT-1  |          |
| ICPL 8357         | ICPL 87119 | No. 418    |          |

**Switchgrass**

|           |              |         |          |
|-----------|--------------|---------|----------|
| Alamo     | Cave-in-Rock | Kanlow  | Sunburst |
| Blackwell | Pathfinder   | Shawnee |          |

**Sugarcane**

|          |          |        |         |
|----------|----------|--------|---------|
| Co775    | L79-1002 | Q138   | SL8613  |
| H73-6110 | M438/59  | Q96    | SL88116 |
| H78-7234 | NCo376   | SL7103 | SLI121  |
| L7130    | Q117     | SL8306 |         |

**Supplementary Table 3.** Independent variable means (top number) and ranges (bottom numbers) from  $\epsilon_c$  regression analyses in six major food crops and  $\epsilon_c$  mean analyses in crop subgroups. Dashes represent unavailable data.

| Species         | Sub-group | Independent Variable <sup>a</sup> |                                                    |           |                                         |                          |                                      |
|-----------------|-----------|-----------------------------------|----------------------------------------------------|-----------|-----------------------------------------|--------------------------|--------------------------------------|
|                 |           | YOR<br>(year)                     | [CO <sub>2</sub> ]<br>( $\mu\text{mol mol}^{-1}$ ) | T<br>(°C) | S <sub>t</sub><br>(MJ m <sup>-2</sup> ) | H <sub>2</sub> O<br>(mm) | Density<br>(plants m <sup>-2</sup> ) |
| Maize           |           | 1987                              | 358                                                | 20.3      | 2871                                    | 407                      | 8.13                                 |
|                 |           | 1959-2008                         | 340-387                                            | 12.3-30.3 | 1994-3855                               | 28-835                   | 2.2-12.2                             |
| Sorghum         |           | 1985                              | 363                                                | 24.0      | 2581                                    | 314                      | --                                   |
| Rice            |           | 1961-2011                         | 335-390                                            | 19.2-30.3 | 2052-3120                               | 178-1130                 |                                      |
|                 |           | 1993                              | 376                                                | 24.8      | 2186                                    | 819                      | --                                   |
| New hybrids     |           | 1966-2010                         | 346-390                                            | 18.2-28.4 | 985-3451                                | 227-1500                 |                                      |
|                 |           | 2000                              | 383                                                | 25.8      | 1619                                    | --                       | --                                   |
| <i>indica</i>   |           | 1984-2010                         | 373-390                                            | 23.1-28.4 | 985-2280                                |                          |                                      |
|                 |           | 1994                              | 383                                                | 25.2      | 1738                                    | 1150                     | --                                   |
| <i>japonica</i> |           | 1976-2010                         | 373-390                                            | 22.8-28.4 | 1531-2010                               | 800-1500                 |                                      |
|                 |           | 1987                              | 370                                                | 23.5      | 2345                                    | 1006                     | --                                   |
| Basmati         |           | 1966-2001                         | 346-386                                            | 18.2-25.2 | 1017-3451                               | 543-1500                 |                                      |
|                 |           | 1998                              | 377                                                | 26.9      | 3026                                    | 352                      | --                                   |
| Wheat           |           | 1996-2000                         | 377                                                | 25.4-28.4 | 2958-3102                               | 227-520                  |                                      |
|                 |           | 1984                              | 366                                                | 12.3      | 2006                                    | 359                      | --                                   |
| Spring          |           | 1912-2010                         | 339-390                                            | 2.22-21.2 | 1140-3026                               | 180-748                  |                                      |
|                 |           | 1977                              | 360                                                | 13.9      | 2094                                    | 441                      | --                                   |
| Winter          |           | 1912-2010                         | 339-390                                            | 8.58-21.2 | 1188-3026                               | 180-681                  |                                      |
|                 |           | 1987                              | 371                                                | 11.1      | 1903                                    | 325                      | --                                   |
| Peanut          |           | 1922-2009                         | 339-390                                            | 2.22-22.5 | 1140-3051                               | 146-748                  |                                      |
|                 |           | 1982                              | 357                                                | 19.8      | 2547                                    | 530                      | --                                   |
| Soybean         |           | 1951-2002                         | 343-380                                            | 5.80-27.7 | 1500-3971                               | 360-791                  |                                      |
|                 |           | 1986                              | 380                                                | 24.4      | 2558                                    | 379                      | --                                   |
|                 |           | 1927-2009                         | 318-396                                            | 18.1-28.8 | 1818-3024                               | 191-1013                 |                                      |

<sup>a</sup> Independent variables included year of release (YOR), mean annual CO<sub>2</sub> concentration ([CO<sub>2</sub>]) during the measurement period, mean growing season temperature (T), and available solar radiation during the growing season (S<sub>t</sub>). Water available as precipitation and irrigation (H<sub>2</sub>O) was included when sample size changed by less than 10% after including it in the analyses. Density was only analyzed in maize.

**Supplementary Table 4.** Partial correlation coefficients (top number) and significance level (bottom number) of independent variables when linearly regressed upon  $\epsilon_c$  in six major food crops. Dashes represent inapplicable or unavailable data.

|                    | Independent Variable <sup>a</sup> |                    |                  |                  |                  |                 |
|--------------------|-----------------------------------|--------------------|------------------|------------------|------------------|-----------------|
|                    | YOR                               | [CO <sub>2</sub> ] | S <sub>t</sub>   | T                | H <sub>2</sub> O | Density         |
| Peanut<br>(n=51)   | 0.278<br>0.056                    | 0.0669<br>0.65     | -0.220<br>0.13   | 0.442<br>0.0016  | --<br>--         | --<br>--        |
| Soybean<br>(n=117) | 0.161<br>0.088                    | 0.290<br>0.0018    | -0.538<br><.0001 | -0.496<br><.0001 | 0.0649<br>0.49   | --<br>--        |
| Rice<br>(n=102)    | 0.101<br>0.32                     | -0.0154<br>0.88    | -0.806<br><.0001 | -0.316<br>0.0015 | --<br>--         | --<br>--        |
| Wheat<br>(n=159)   | 0.170<br>0.034                    | -0.0423<br>0.60    | -0.128<br>0.11   | -0.237<br>0.0029 | --<br>--         | --<br>--        |
| Sorghum<br>(n=23)  | 0.173<br>0.47                     | 0.266<br>0.26      | -0.485<br>0.030  | 0.268<br>0.25    | --<br>--         | --<br>--        |
| Maize<br>(n=149)   | 0.204<br>0.014                    | -0.0775<br>0.35    | 0.105<br>0.21    | 0.0372<br>0.66   | --<br>--         | -0.0439<br>0.60 |

<sup>a</sup> Independent variables included year of release (YOR), mean annual CO<sub>2</sub> concentration ([CO<sub>2</sub>]) during the measurement period, mean growing season temperature (T), and available solar radiation during the growing season (S<sub>t</sub>). Water available as precipitation and irrigation (H<sub>2</sub>O) was included when sample size changed by less than 10% after including it in the analyses. Density was only analyzed in maize.
